# Supplementary material
Source: publisher figshare collection journal article supplement (https://acs.figshare.com/ndownloader/files/4111444)
Supplement: Supplementary file 1 [file 4111444]

data_General
_audit_creation_date                  '2010-11-14'
_audit_creation_method                'by CrystalStructure 3.8'

#==============================================================================

# SUBMISSION DETAILS

_publ_contact_author_name             'Jun'ya Tsutsumi'
_publ_contact_author_email            'junya.tsutsumi@aist.go.jp'
_publ_contact_author_fax              '+81-29-861-2586'
_publ_contact_author_phone            '+81-29-861-2582'
_publ_requested_journal               'Journal of the American Chemical Society'
_publ_requested_category              'FA'
loop_
_publ_author_name
'J. Tsutsumi'
'H. Matsui'
'T. Yamada'
'R. Kumai'
'T. Hasegawa'

#==============================================================================

data_TMBTQ

#==============================================================================

# CHEMICAL DATA

_chemical_formula_sum                  'C28 H24 N6 '
_chemical_formula_moiety               '(C16H20N2),(C12H4N4)'
_chemical_formula_weight               444.54
_chemical_name_systematic
;
3,3',5,5'-tetramethylbenzidine
7,7,8,8-tetracyanoquinodimethnae 
;

#==============================================================================

# CRYSTAL DATA
_symmetry_cell_setting                 monoclinic
_symmetry_space_group_name_H-M        'P 1 21/n 1'
_symmetry_space_group_name_Hall       '-P 2yn'
_symmetry_Int_Tables_number            14
loop_
_symmetry_equiv_pos_site_id
_symmetry_equiv_pos_as_xyz
1   '+X,+Y,+Z'
2   '1/2-X,1/2+Y,1/2-Z'
3   '-X,-Y,-Z'
4   '1/2+X,1/2-Y,1/2+Z'

#------------------------------------------------------------------------------

_cell_length_a                         6.7481(12)
_cell_length_b                         21.891(3)
_cell_length_c                         8.1279(11)
_cell_angle_alpha                      90.0000
_cell_angle_beta                       100.229(11)
_cell_angle_gamma                      90.0000
_cell_volume                           1181.6(3)
_cell_formula_units_Z                  2
_cell_measurement_reflns_used          5944
_cell_measurement_theta_min            6.4
_cell_measurement_theta_max            71.5
_cell_measurement_temperature          293.1

#------------------------------------------------------------------------------

_exptl_crystal_description            'block'
_exptl_crystal_colour                 'black'
_exptl_crystal_size_max                0.10
_exptl_crystal_size_mid                0.10
_exptl_crystal_size_min                0.05
_exptl_crystal_density_diffrn          1.249
_exptl_crystal_density_meas            ?
_exptl_crystal_density_method         'not measured'
_exptl_crystal_F_000                   468.00
_exptl_absorpt_coefficient_mu          0.000
_exptl_absorpt_correction_type         multi-scan
_exptl_absorpt_correction_T_min        0.805
_exptl_absorpt_correction_T_max        1.000

#==============================================================================

# EXPERIMENTAL DATA

_diffrn_ambient_temperature            293.1
_diffrn_radiation_type                'synchrotron'
_diffrn_radiation_wavelength           1.00000
_diffrn_measurement_device_type       IPDSC
_diffrn_reflns_number                  8655
_diffrn_reflns_av_R_equivalents        0.017
_diffrn_reflns_theta_max               72.04
_diffrn_measured_fraction_theta_max    0.528
_diffrn_reflns_theta_full              72.04
_diffrn_measured_fraction_theta_full   0.528
_diffrn_reflns_limit_h_min             -4
_diffrn_reflns_limit_h_max             7
_diffrn_reflns_limit_k_min             -33
_diffrn_reflns_limit_k_max             41
_diffrn_reflns_limit_l_min             -10
_diffrn_reflns_limit_l_max             15

#==============================================================================

# REFINEMENT DATA

_refine_special_details
;
    Refinement was performed using reflections with F^2^ > 3.0 sigma(F^2^).
    The weighted R-factor(wR), goodness of fit (S) and R-factor (gt) are 
    based on F, with F set to zero for negative F. The threshold expression of
    F^2^ > 2.0 sigma(F^2^) is used only for calculating R-factor (gt).
;
_reflns_number_total                   4503
_reflns_number_gt                      1642
_reflns_threshold_expression           F^2^>2.0\s(F^2^)
_refine_ls_structure_factor_coef       F
_refine_ls_R_factor_gt                 0.0434
_refine_ls_wR_factor_ref               0.0493
_refine_ls_hydrogen_treatment          refall
_refine_ls_number_reflns               1642
_refine_ls_number_parameters           202
_refine_ls_goodness_of_fit_ref         1.047
_refine_ls_weighting_scheme            calc
_refine_ls_weighting_details
;
    Chebychev polynomial with 3 parameters (Carruthers & Watkin, 1979)
    7.1457    3.7952    5.9889
;
_refine_ls_shift/su_max                0.0000
_refine_diff_density_max               0.28
_refine_diff_density_min               -0.18
_refine_ls_extinction_method           none
_refine_ls_extinction_coef             ?

#==============================================================================

# ATOMIC COORDINATES AND THERMAL PARAMETERS

loop_
_atom_site_label
_atom_site_type_symbol
_atom_site_fract_x
_atom_site_fract_y
_atom_site_fract_z
_atom_site_U_iso_or_equiv
_atom_site_adp_type
_atom_site_occupancy
_atom_site_symmetry_multiplicity
_atom_site_calc_flag
_atom_site_refinement_flags
_atom_site_disorder_assembly
_atom_site_disorder_group
 N(1) N 0.0517(2) 0.20757(6) 0.2441(2) 0.0662(4) Uani 1.00 1 d . . .
 N(2) N 0.5237(2) 0.21533(6) 0.04621(18) 0.0667(4) Uani 1.00 1 d . . .
 N(3) N 0.5906(2) 0.10975(9) 0.50424(18) 0.0781(5) Uani 1.00 1 d . . .
 C(1) C 0.0430(2) 0.04012(5) 0.21109(13) 0.0392(3) Uani 1.00 1 d . . .
 C(2) C 0.5245(2) -0.00278(5) 0.17520(13) 0.0399(3) Uani 1.00 1 d . . .
 C(3) C 0.0562(2) 0.09777(6) 0.28297(14) 0.0422(3) Uani 1.00 1 d . . .
 C(4) C 0.0083(2) 0.14173(5) 0.00265(15) 0.0432(3) Uani 1.00 1 d . . .
 C(5) C -0.0069(2) 0.08332(5) -0.06270(14) 0.0406(3) Uani 1.00 1 d . . .
 C(7) C 0.5362(2) 0.10936(5) 0.18289(14) 0.0418(3) Uani 1.00 1 d . . .
 C(8) C 0.0378(2) 0.14956(5) 0.17783(16) 0.0440(3) Uani 1.00 1 d . . .
 C(9) C -0.0074(3) 0.19640(7) -0.1111(2) 0.0657(5) Uani 1.00 1 d . . .
 C(10) C 0.5296(2) 0.16776(5) 0.10542(15) 0.0474(4) Uani 1.00 1 d . . .
 C(11) C 0.5657(2) 0.10960(6) 0.36134(17) 0.0514(4) Uani 1.00 1 d . . .
 C(12) C 0.0900(3) 0.10554(9) 0.46983(17) 0.0596(5) Uani 1.00 1 d . . .
 C(13) C 0.4924(2) 0.05565(5) -0.08737(14) 0.0402(3) Uani 1.00 1 d . . .
 C(14) C 0.5179(2) 0.05536(5) 0.09172(13) 0.0378(3) Uani 1.00 1 d . . .
 C(17) C 0.0083(2) 0.03066(4) 0.03702(11) 0.0349(2) Uani 1.00 1 d . . .
 H(1) H 0.215(3) 0.1292(9) 0.506(2) 0.083(5) Uiso 1.00 1 c . . .
 H(2) H 0.112(3) 0.0668(12) 0.527(2) 0.098(6) Uiso 1.00 1 c . . .
 H(3) H -0.021(5) 0.1253(14) 0.508(3) 0.129(9) Uiso 1.00 1 c . . .
 H(4) H 0.045(3) 0.2112(11) 0.353(2) 0.092(6) Uiso 1.00 1 c . . .
 H(5) H 0.031(3) 0.2374(10) 0.171(2) 0.079(5) Uiso 1.00 1 c . . .
 H(6) H -0.116(3) 0.2236(9) -0.089(2) 0.080(5) Uiso 1.00 1 c . . .
 H(7) H -0.041(3) 0.1830(11) -0.230(2) 0.110(8) Uiso 1.00 1 c . . .
 H(8) H 0.122(4) 0.2202(13) -0.085(2) 0.110(8) Uiso 1.00 1 c . . .
 H(9) H 0.536(2) -0.0037(7) 0.2969(19) 0.057(4) Uiso 1.00 1 c . . .
 H(10) H 0.494(2) 0.0960(7) -0.147(2) 0.057(4) Uiso 1.00 1 c . . .
 H(11) H -0.035(2) 0.0788(7) -0.186(2) 0.063(4) Uiso 1.00 1 c . . .
 H(12) H 0.058(2) 0.0073(8) 0.292(2) 0.063(4) Uiso 1.00 1 c . . .


loop_
_atom_site_aniso_label
_atom_site_aniso_U_11
_atom_site_aniso_U_22
_atom_site_aniso_U_33
_atom_site_aniso_U_12
_atom_site_aniso_U_13
_atom_site_aniso_U_23
 N(1) 0.0810(13) 0.0467(6) 0.0709(8) -0.0043(5) 0.0132(7) -0.0223(5)
 N(2) 0.0894(13) 0.0415(5) 0.0741(8) 0.0010(5) 0.0282(7) 0.0053(4)
 N(3) 0.0701(14) 0.1145(12) 0.0495(6) -0.0115(8) 0.0100(6) -0.0078(7)
 C(1) 0.0423(10) 0.0434(5) 0.0329(4) -0.0029(4) 0.0097(4) -0.0048(3)
 C(2) 0.0447(10) 0.0382(4) 0.0372(4) 0.0001(4) 0.0081(4) 0.0075(3)
 C(3) 0.0378(10) 0.0518(5) 0.0385(4) -0.0057(4) 0.0109(4) -0.0117(4)
 C(4) 0.0460(11) 0.0357(4) 0.0480(5) 0.0036(4) 0.0089(5) -0.0020(3)
 C(5) 0.0485(10) 0.0370(4) 0.0364(4) 0.0050(4) 0.0080(4) -0.0001(3)
 C(7) 0.0440(10) 0.0384(4) 0.0442(5) -0.0011(4) 0.0113(5) 0.0008(3)
 C(8) 0.0396(10) 0.0424(5) 0.0510(5) -0.0009(4) 0.0108(5) -0.0132(4)
 C(9) 0.0880(17) 0.0391(6) 0.0683(9) 0.0087(7) 0.0091(8) 0.0086(5)
 C(10) 0.0524(12) 0.0382(5) 0.0544(6) -0.0007(4) 0.0171(5) -0.0020(4)
 C(11) 0.0474(13) 0.0580(7) 0.0493(6) -0.0046(5) 0.0102(6) -0.0037(4)
 C(12) 0.0613(16) 0.0796(10) 0.0393(5) -0.0101(8) 0.0127(6) -0.0190(5)
 C(13) 0.0451(10) 0.0359(4) 0.0401(5) 0.0014(4) 0.0090(4) 0.0088(3)
 C(14) 0.0389(10) 0.0353(4) 0.0397(4) 0.0001(4) 0.0080(4) 0.0042(3)
 C(17) 0.0387(9) 0.0348(4) 0.0322(3) 0.0010(3) 0.0092(4) -0.0023(2)

#==============================================================================

_computing_data_collection            'PROCESS-AUTO'
_computing_cell_refinement            'PROCESS-AUTO'
_computing_data_reduction             'CrystalStructure'
_computing_structure_solution         'SIR2004'
_computing_structure_refinement       'CRYSTALS'
_computing_publication_material       'CrystalStructure 3.8'
_computing_molecular_graphics          ?

#==============================================================================

#     End of CIF

#==============================================================================
